# Supplementary material for: Contrasting Litter Nutrient and Metal Inputs and Soil Chemistry among Five Common Eastern North American Tree Species
Source: MDPI journal article supplement (doi:10.3390/f12050613), 2021-05-13
Supplement: s1 [file s1]

## Supplementary Materials

**Table S1.** Locations and characteristics of the study plots in the Haliburton Forest.

| Site | Latitude | Longitude | Elevation<br>(m) | Basal<br>Area<br>(m <sup>2</sup> /ha) | Stem<br>Density<br>(trees/ha) | Species Composition<br>(% of total Basal Area) |
|------|----------|-----------|------------------|---------------------------------------|-------------------------------|------------------------------------------------|
| BF01 | 45.2588  | -78.4889  | 384              | 52.70                                 | 600                           | BF 79 %, SM 21 %                               |
| BF02 | 45.2590  | -78.4885  | 384              | 27.99                                 | 950                           | BF 58 %, SM 24 %, YB 19 %                      |
| BF03 | 45.2543  | -78.4899  | 389              | 18.36                                 | 350                           | BF 53 %, SM 21 %, BA 26 %                      |
| EH01 | 45.2576  | -78.4910  | 379              | 38.55                                 | 400                           | EH 76 %, WC 23 %, BF 1 %                       |
| EH02 | 45.2578  | -78.4904  | 379              | 17.90                                 | 500                           | EH 100 %                                       |
| EH03 | 45.2450  | -78.4826  | 380              | 32.50                                 | 100                           | EH 100%                                        |
| WP01 | 45.3253  | -78.6572  | 410              | 34.62                                 | 350                           | WP 95 %, AB 4 %, EH 2 %                        |
| WP02 | 45.3255  | -78.6562  | 414              | 19.38                                 | 400                           | WP 74 %, WB 12%, Other 11 %, BF 3 %            |
| WP03 | 45.3220  | -78.6412  | 355              | 14.87                                 | 525                           | WP 83 %, BF 17 %                               |
| WP04 | 45.2681  | -78.4540  | 489              | 35.24                                 | 500                           | WP 100 %                                       |
| WP05 | 45.2701  | -78.4515  | 488              | 19.68                                 | 375                           | WP 100 %                                       |
| SM01 | 45.3272  | -78.6276  | 365              | 15.99                                 | 350                           | SM 65 %, BF 35 %                               |
| SM02 | 45.3283  | -78.6272  | 365              | 17.15                                 | 250                           | SM 81 %, WB 15 %, AE 4 %                       |
| SM03 | 45.2546  | -78.5045  | 385              | 31.42                                 | 75                            | SM 93 %, YB 5 %, BF 2 %                        |
| SM04 | 45.2597  | -78.4790  | 399              | 37.16                                 | 275                           | SM 92 %, BC 5 %, YB 1 %, WB 1 %, BF 1 %        |
| SM05 | 45.2626  | -78.4660  | 415              | 16.17                                 | 100                           | SM 100 %                                       |
| YB01 | 45.2428  | -78.4796  | 379              | 17.28                                 | 500                           | YB 95 %, BF 5 %                                |
| YB02 | 45.2428  | -78.4792  | 380              | 25.92                                 | 700                           | YB 93 %, WB 7 %                                |
| YB03 | 45.2412  | -78.4598  | 395              | 33.94                                 | 400                           | YB 87 %, BF 13 %                               |

Species Abbreviations: AB = American Beech, AE = American Elm, BC = Black Cherry, BF = Balsam Fir, BA = Black Ash, EH = Eastern Hemlock, SM = Sugar Maple, WB = White Birch, WC = White Cedar, WP = White Pine, YB = Yellow Birch

**Table S2.** Leaf litter inputs in coniferous, deciduous, and woody debris in stands of five species.

| Litter type  | Balsam<br>Fir                 | Eastern<br>Hemlock             | White<br>Pine                 | Sugar<br>Maple                 | Yellow<br>Birch                | <i>p</i> Value |
|--------------|-------------------------------|--------------------------------|-------------------------------|--------------------------------|--------------------------------|----------------|
| Units: kg/ha |                               |                                |                               |                                |                                |                |
| Coniferous   | 997.0 <sup>a</sup><br>(103.3) | 1081.8 <sup>a</sup><br>(209.0) | 947.4 <sup>a</sup><br>(161.1) | 102.1 <sup>b</sup><br>(85.7)   | 36.2 <sup>b</sup><br>(13.2)    | <0.001         |
| Deciduous    | 1013.6 <sup>a</sup><br>(84.1) | 491.3 <sup>a</sup><br>(399.6)  | 230.2 <sup>a</sup><br>(84.3)  | 3016.4 <sup>b</sup><br>(290.2) | 2317.2 <sup>b</sup><br>(319.5) | <0.001         |
| Woody Debris | 408.0 <sup>a</sup><br>(17.8)  | 202.6 <sup>ab</sup><br>(94.8)  | 42.8 <sup>b</sup><br>(24.4)   | 49.1 <sup>b</sup><br>(7.0)     | 130.9 <sup>b</sup><br>(49.2)   | <0.001         |
| Sum          | 2419 <sup>ab</sup>            | 1776 <sup>ab</sup>             | 1220 <sup>b</sup>             | 3168 <sup>a</sup>              | 2484 <sup>ab</sup>             | 0.003          |

**Table S3.** ANOVA test *p* values for litterfall inputs and soil pools for carbon and the macronutrients by litter type, soil horizon, and the sum of total litterfall and the total soil pool. (--) = ANOVA test not conducted for soil horizon.

|                 | C      | N      | Ca     | Mg     | K      | P      |
|-----------------|--------|--------|--------|--------|--------|--------|
| Con             | 0.779  | 0.062  | 0.121  | 0.018  | 0.017  | 0.046  |
| Dec             | <0.001 | <0.001 | <0.001 | <0.001 | <0.001 | <0.001 |
| WD              | 0.006  | <0.001 | 0.009  | 0.009  | 0.002  | <0.001 |
| Sum             | 0.006  | <0.001 | <0.001 | <0.001 | <0.001 | <0.001 |
| L               | 0.042  | 0.141  | 0.022  | <0.001 | <0.001 | <0.001 |
| FH              | 0.118  | 0.014  | 0.006  | <0.001 | 0.005  | <0.001 |
| Ah              | 0.836  | 0.503  | 0.469  | 0.466  | 0.449  | 0.246  |
| Bm <sub>1</sub> | 0.350  | 0.666  | 0.020  | 0.005  | 0.732  | --     |
| Bm <sub>2</sub> | 0.553  | 0.850  | 0.162  | 0.431  | 0.118  | --     |
| Sum             | 0.327  | 0.762  | 0.251  | 0.574  | 0.082  | 0.085  |

**Table S4.** Carbon concentrations in litterfall and soil beneath the five tree species.

| Litterfall                                                                                                                               | Carbon                      |                            |                            |                            |                             | <i>p</i> Value |
|------------------------------------------------------------------------------------------------------------------------------------------|-----------------------------|----------------------------|----------------------------|----------------------------|-----------------------------|----------------|
|                                                                                                                                          | Balsam<br>Fir               | Eastern<br>Hemlock         | White<br>Pine              | Sugar<br>Maple             | Yellow<br>Birch             |                |
| Coniferous                                                                                                                               | 52.2<br>(0.9)               | 52.0<br>(0.7)              | 50.3<br>(0.2)              | --                         | --                          | 0.064          |
| Deciduous                                                                                                                                | 49.8<br>(0.5)               | 50.4<br>(1.1)              | 46.1<br>(2.7)              | 45.7<br>(0.1)              | 49.8<br>(0.4)               | 0.289          |
| Woody Debris                                                                                                                             | 50.2 <sup>ab</sup><br>(1.0) | 53.4 <sup>a</sup><br>(0.4) | --                         | 46.9 <sup>b</sup><br>(1.0) | 50.3 <sup>ab</sup><br>(0.7) | 0.004          |
| <b>Horizon</b>                                                                                                                           |                             |                            |                            |                            |                             |                |
| L                                                                                                                                        | 48.8 <sup>a</sup><br>(0.8)  | 50.2 <sup>a</sup><br>(0.2) | 47.0 <sup>a</sup><br>(0.5) | 41.8 <sup>b</sup><br>(1.3) | 47.8 <sup>a</sup><br>(0.5)  | <0.001         |
| FH                                                                                                                                       | 43.0 <sup>a</sup><br>(3.9)  | 48.9 <sup>a</sup><br>(0.2) | 37.0 <sup>a</sup><br>(2.5) | 24.8 <sup>b</sup><br>(2.9) | 43.6 <sup>a</sup><br>(5.7)  | 0.001          |
| Ah                                                                                                                                       | 2.5<br>(1.1)                | 2.1<br>(0.6)               | 6.7<br>(1.2)               | 4.6<br>(1.2)               | 5.1<br>(1.1)                | 0.077          |
| Bm <sub>1</sub>                                                                                                                          | 2.7<br>(1.1)                | 4.0<br>(1.0)               | 5.0<br>(0.9)               | 3.7<br>(1.2)               | 8.3<br>(0.5)                | 0.489          |
| Bm <sub>2</sub>                                                                                                                          | 2.5<br>(1.1)                | 4.5<br>(1.1)               | 4.1<br>(1.1)               | 3.1<br>(0.9)               | 8.1<br>(0.7)                | 0.633          |
| Total elemental concentrations in % of soil or litterfall,<br>(--)= not enough litter collected for analysis, Standard error in brackets |                             |                            |                            |                            |                             |                |

**Table S5.** Nitrogen concentrations in litterfall and soil beneath the five tree species.

| Litterfall                                                                                                                                | Nitrogen                   |                             |                            |                            |                            | <i>p</i> Value |
|-------------------------------------------------------------------------------------------------------------------------------------------|----------------------------|-----------------------------|----------------------------|----------------------------|----------------------------|----------------|
|                                                                                                                                           | Balsam<br>Fir              | Eastern<br>Hemlock          | White<br>Pine              | Sugar<br>Maple             | Yellow<br>Birch            |                |
| Coniferous                                                                                                                                | 1.0 <sup>a</sup><br>(<0.1) | 1.0 <sup>a</sup><br>(<0.1)  | 0.6 <sup>b</sup><br>(<0.1) | --                         | --                         | <0.001         |
| Deciduous                                                                                                                                 | 1.0 <sup>a</sup><br>(<0.1) | 0.9 <sup>a</sup><br>(0.1)   | 0.8 <sup>a</sup><br>(0.2)  | 0.9 <sup>a</sup><br>(0.1)  | 1.6 <sup>b</sup><br>(0.3)  | 0.023          |
| Woody Debris                                                                                                                              | 2.5 <sup>a</sup><br>(0.3)  | 1.2 <sup>b</sup><br>(<0.1)  | --                         | 0.9 <sup>b</sup><br>(0.1)  | 2.2 <sup>ab</sup><br>(0.4) | <0.001         |
| <b>Horizon</b>                                                                                                                            |                            |                             |                            |                            |                            |                |
| L                                                                                                                                         | 1.9 <sup>a</sup><br>(0.1)  | 1.4 <sup>ab</sup><br>(<0.1) | 1.2 <sup>b</sup><br>(0.1)  | 1.6 <sup>ab</sup><br>(0.1) | 2.0 <sup>a</sup><br>(0.2)  | 0.005          |
| FH                                                                                                                                        | 2.1 <sup>a</sup><br>(0.1)  | 1.9 <sup>ab</sup><br>(0.1)  | 1.4 <sup>b</sup><br>(0.1)  | 1.4 <sup>b</sup><br>(0.2)  | 2.2 <sup>a</sup><br>(0.1)  | 0.002          |
| Ah                                                                                                                                        | 0.2<br>(0.1)               | 0.1<br>(<0.1)               | 0.3<br>(0.1)               | 1.7<br>(0.1)               | 0.4<br>(<0.1)              | 0.086          |
| Bm <sub>1</sub>                                                                                                                           | 0.2<br>(0.1)               | 0.2<br>(<0.1)               | 0.2<br>(<0.1)              | 0.3<br>(0.1)               | 0.5<br>(<0.1)              | 0.699          |
| Bm <sub>2</sub>                                                                                                                           | 0.2<br>(0.1)               | 0.2<br>(<0.1)               | 0.2<br>(<0.1)              | 0.2<br>(0.1)               | 0.5<br>(<0.1)              | 0.939          |
| Total elemental concentrations in % of soil or litterfall,<br>(--) = not enough litter collected for analysis, Standard error in brackets |                            |                             |                            |                            |                            |                |

**Table S6.** Phosphorus concentrations in litterfall and soil beneath the five tree species.

| Litterfall                                                                  | Phosphorus                     |                               |                               |                               |                                | <i>p</i> Value |
|-----------------------------------------------------------------------------|--------------------------------|-------------------------------|-------------------------------|-------------------------------|--------------------------------|----------------|
|                                                                             | Balsam<br>Fir                  | Eastern<br>Hemlock            | White<br>Pine                 | Sugar<br>Maple                | Yellow<br>Birch                |                |
| Coniferous                                                                  | 862.9 <sup>a</sup><br>(186.1)  | 662.1 <sup>ab</sup><br>(23.2) | 353.2 <sup>b</sup><br>(30.1)  | --                            | --                             | 0.009          |
| Deciduous                                                                   | 697.0 <sup>a</sup><br>(107.7)  | 516.4 <sup>ab</sup><br>(11.4) | 476.6 <sup>ab</sup><br>(50.7) | 413.4 <sup>b</sup><br>(50.8)  | 655.7 <sup>ab</sup><br>(34.9)  | 0.045          |
| Woody Debris                                                                | 2548.7 <sup>a</sup><br>(186.9) | 960.6 <sup>b</sup><br>(132.5) | --                            | 629.4 <sup>b</sup><br>(128.1) | 2265.0 <sup>a</sup><br>(521.5) | 0.001          |
| <b>Horizon</b>                                                              |                                |                               |                               |                               |                                |                |
| L                                                                           | 1054.7<br>(199.7)              | 797.5<br>(25.9)               | 693.9<br>(57.5)               | 792.2<br>(63.5)               | 1005.1<br>(123.8)              | 0.100          |
| FH                                                                          | 1156.6 <sup>a</sup><br>(96.3)  | 898.7 <sup>ab</sup><br>(39.6) | 765.6 <sup>b</sup><br>(47.2)  | 759.6 <sup>b</sup><br>(91.0)  | 1150.4 <sup>a</sup><br>(5.1)   | 0.006          |
| Ah                                                                          | 370.7<br>(114.0)               | 65.8<br>(28.1)                | 413.8<br>(87.2)               | 535.2<br>(196.0)              | 191.1<br>(21.9)                | 0.241          |
| Total elemental concentrations in mg/kg,                                    |                                |                               |                               |                               |                                |                |
| (--) = not enough litter collected for analysis, Standard error in brackets |                                |                               |                               |                               |                                |                |

**Table S7.** Calcium concentrations in litterfall and soil beneath the five tree species.

| Calcium                                                                                                                                    |                       |                       |                       |                        |                       |                |
|--------------------------------------------------------------------------------------------------------------------------------------------|-----------------------|-----------------------|-----------------------|------------------------|-----------------------|----------------|
| Litterfall                                                                                                                                 | Balsam Fir            | Eastern Hemlock       | White Pine            | Sugar Maple            | Yellow Birch          | <i>p</i> Value |
| Coniferous                                                                                                                                 | 10359.6 <sup> a</sup> | 10704.6 <sup> a</sup> | 6391.4 <sup> b</sup>  | --                     | --                    | 0.001          |
|                                                                                                                                            | (793.7)               | (1014.0)              | (277.3)               |                        |                       |                |
| Deciduous                                                                                                                                  | 11816.3 <sup>ab</sup> | 11763.4 <sup>ab</sup> | 7572.1 <sup> b</sup>  | 11240.7 <sup> a</sup>  | 12604.6 <sup> a</sup> | 0.047          |
|                                                                                                                                            | (152.3)               | (2506.4)              | (1011.7)              | (1080.1)               | (329.1)               |                |
| Woody Debris                                                                                                                               | 9409.8 <sup> ab</sup> | 4864.4 <sup> b</sup>  | --                    | 10259.3 <sup> ab</sup> | 10026.0 <sup> a</sup> | 0.020          |
|                                                                                                                                            | (978.9)               | (726.5)               |                       | (1945.1)               | (311.4)               |                |
| Horizon                                                                                                                                    |                       |                       |                       |                        |                       |                |
| L                                                                                                                                          | 7864.1 <sup> a</sup>  | 5813.4 <sup> ab</sup> | 7821.3 <sup> a</sup>  | 4406.3 <sup> b</sup>   | 8287.7 <sup> a</sup>  | <0.001         |
|                                                                                                                                            | (593.4)               | (538.2)               | (274.8)               | (379.8)                | (731.1)               |                |
| FH                                                                                                                                         | 5622.9 <sup> ab</sup> | 6957.8 <sup> a</sup>  | 5160.3 <sup> ab</sup> | 3817.6 <sup> b</sup>   | 6020.3 <sup> ab</sup> | 0.022          |
|                                                                                                                                            | (677.5)               | (2354.3)              | (546.3)               | (179.7)                | (967.9)               |                |
| Ah                                                                                                                                         | 138.7                 | 97.1                  | 442.4                 | 457.2                  | 233.5                 | 0.124          |
|                                                                                                                                            | (38.5)                | (27.7)                | (98.5)                | (145.2)                | (39.4)                |                |
| Bm <sub>1</sub>                                                                                                                            | 69.4 <sup> ab</sup>   | 53.3 <sup> b</sup>    | 193.7 <sup> a</sup>   | 150.5 <sup> ab</sup>   | 152.9 <sup> ab</sup>  | 0.021          |
|                                                                                                                                            | (12.1)                | (8.5)                 | (26.8)                | (34.7)                 | (4.1)                 |                |
| Bm <sub>2</sub>                                                                                                                            | 72.1                  | 70.8                  | 150.9                 | 73.7                   | 154.9                 | 0.213          |
|                                                                                                                                            | (5.5)                 | (30.2)                | (65.8)                | (27.2)                 | (41.3)                |                |
| Litterfall and exchangeable cation concentrations in mg/kg,<br>(--) = not enough litter collected for analysis, Standard error in brackets |                       |                       |                       |                        |                       |                |

**Table S8.** Magnesium concentrations in litterfall and soil beneath the five tree species.

| Litterfall                                                                                                                                | Magnesium                       |                                |                                |                                |                                | <i>p</i> Value |
|-------------------------------------------------------------------------------------------------------------------------------------------|---------------------------------|--------------------------------|--------------------------------|--------------------------------|--------------------------------|----------------|
|                                                                                                                                           | Balsam<br>Fir                   | Eastern<br>Hemlock             | White<br>Pine                  | Sugar<br>Maple                 | Yellow<br>Birch                |                |
| Coniferous                                                                                                                                | 748.7 <sup>a</sup><br>(632.1)   | 1324.3 <sup>b</sup><br>(66.7)  | 612.8 <sup>a</sup><br>(36.6)   | --                             | --                             | <0.001         |
| Deciduous                                                                                                                                 | 1352.4 <sup>ab</sup><br>(141.8) | 1826.1 <sup>bc</sup><br>(55.2) | 1050.6 <sup>a</sup><br>(153.5) | 1187.1 <sup>ab</sup><br>(47.1) | 2474.5 <sup>c</sup><br>(33.6)  | <0.001         |
| Woody Debris                                                                                                                              | 1527.0 <sup>ab</sup><br>(142.1) | 964.3 <sup>a</sup><br>(36.7)   | --                             | 955.0 <sup>a</sup><br>(144.7)  | 1986.3 <sup>b</sup><br>(233.6) | 0.004          |
| <b>Horizon</b>                                                                                                                            |                                 |                                |                                |                                |                                |                |
| L                                                                                                                                         | 888.9 <sup>a</sup><br>(97.0)    | 950.1 <sup>a</sup><br>(11.1)   | 685.2 <sup>a</sup><br>(81.3)   | 997.5 <sup>a</sup><br>(51.4)   | 1703.5 <sup>b</sup><br>(370.0) | <0.001         |
| FH                                                                                                                                        | 496.8<br>(58.9)                 | 591.3<br>(21.0)                | 403.4<br>(39.5)                | 424.8<br>(46.7)                | 557.7<br>(159.0)               | 0.001          |
| Ah                                                                                                                                        | 17.9 <sup>a</sup><br>(6.2)      | 15.1 <sup>a</sup><br>(3.5)     | 58.6 <sup>b</sup><br>(10.1)    | 36.2 <sup>ab</sup><br>(6.2)    | 16.3 <sup>a</sup><br>(2.5)     | 0.077          |
| Bm <sub>1</sub>                                                                                                                           | 7.6 <sup>a</sup><br>(1.9)       | 9.0 <sup>a</sup><br>(1.2)      | 27.3 <sup>b</sup><br>(34.7)    | 18.4 <sup>ab</sup><br>(2.3)    | 9.0 <sup>a</sup><br>(1.1)      | 0.489          |
| Bm <sub>2</sub>                                                                                                                           | 7.7<br>(1.3)                    | 10.8<br>(2.9)                  | 15.0<br>(27.2)                 | 17.2<br>(5.9)                  | 8.8<br>(2.1)                   | 0.633          |
| Litterfall and exchangeable cation concentrations in mg/kg,<br>(--)= not enough litter collected for analysis, Standard error in brackets |                                 |                                |                                |                                |                                |                |

**Table S9.** Potassium concentrations in litterfall and soil beneath the five tree species.

| Litterfall                                                                                                                                | Potassium                       |                                 |                               |                                |                                 | <i>p</i> Value |
|-------------------------------------------------------------------------------------------------------------------------------------------|---------------------------------|---------------------------------|-------------------------------|--------------------------------|---------------------------------|----------------|
|                                                                                                                                           | Balsam<br>Fir                   | Eastern<br>Hemlock              | White<br>Pine                 | Sugar<br>Maple                 | Yellow<br>Birch                 |                |
| Coniferous                                                                                                                                | 1354.5 <sup>a</sup><br>(77.4)   | 1281.8 <sup>a</sup><br>(63.0)   | 685.6 <sup>b</sup><br>(57.0)  | --                             | --                              | <0.001         |
| Deciduous                                                                                                                                 | 1561.4 <sup>a</sup><br>(87.9)   | 1347.2 <sup>ab</sup><br>(140.5) | 863.1 <sup>b</sup><br>(121.3) | 2331.2 <sup>c</sup><br>(169.5) | 1308.2 <sup>ab</sup><br>(114.7) | <0.001         |
| Woody Debris                                                                                                                              | 4654.3 <sup>a</sup><br>(553.4)  | 2539.3 <sup>ab</sup><br>(530.2) | --                            | 1771.0 <sup>b</sup><br>(64.2)  | 4544.8 <sup>a</sup><br>(984.0)  | 0.014          |
| <b>Horizon</b>                                                                                                                            |                                 |                                 |                               |                                |                                 |                |
| L                                                                                                                                         | 1554.8 <sup>ab</sup><br>(258.6) | 1658.9 <sup>a</sup><br>(284.3)  | 884.9 <sup>b</sup><br>(64.3)  | 1281.5 <sup>ab</sup><br>(76.3) | 1362.9 <sup>ab</sup><br>(147.1) | 0.022          |
| FH                                                                                                                                        | 815.2 <sup>ab</sup><br>(76.0)   | 1059.8 <sup>a</sup><br>(120.0)  | 598.5 <sup>b</sup><br>(69.0)  | 508.8 <sup>b</sup><br>(94.5)   | 732.1 <sup>ab</sup><br>(206.5)  | 0.017          |
| Ah                                                                                                                                        | 27.5 <sup>ab</sup><br>(11.7)    | 27.1 <sup>a</sup><br>(4.0)      | 75.0 <sup>b</sup><br>(12.1)   | 54.2 <sup>ab</sup><br>(10.3)   | 23.4 <sup>ab</sup><br>(4.0)     | 0.018          |
| Bm <sub>1</sub>                                                                                                                           | 13.2 <sup>a</sup><br>(4.8)      | 18.3 <sup>a</sup><br>(2.9)      | 54.9 <sup>b</sup><br>(9.0)    | 27.8 <sup>ab</sup><br>(7.1)    | 10.8 <sup>a</sup><br>(0.2)      | 0.006          |
| Bm <sub>2</sub>                                                                                                                           | 12.9 <sup>a</sup><br>(5.1)      | 19.0 <sup>ab</sup><br>(3.1)     | 34.3 <sup>b</sup><br>(6.3)    | 19.4 <sup>ab</sup><br>(3.4)    | 10.8 <sup>a</sup><br>(4.4)      | 0.044          |
| Litterfall and exchangeable cation concentrations in mg/kg,<br>(--)= not enough litter collected for analysis, Standard error in brackets |                                 |                                 |                               |                                |                                 |                |



**Table S10.** ANOVA test *p* values for litterfall inputs and soil pools for micronutrients and trace metals by litter type, soil horizon, and the sum of total litterfall and the total soil pool.

|     | Al    | Mn    | Zn     | Sr     | Cu     | Cd     |
|-----|-------|-------|--------|--------|--------|--------|
| Con | 0.349 | 0.549 | 0.690  | 0.017  | 0.343  | 0.741  |
| Dec | 0.151 | 0.010 | <0.001 | <0.001 | 0.014  | <0.001 |
| WD  | 0.097 | 0.007 | 0.003  | 0.007  | 0.307  | 0.258  |
| Sum | 0.007 | 0.059 | <0.001 | <0.001 | 0.006  | <0.001 |
| L   | 0.010 | 0.034 | 0.053  | <0.001 | <0.001 | <0.001 |
| FH  | 0.064 | 0.029 | <0.001 | <0.001 | <0.001 | <0.001 |
| Sum | 0.080 | 0.033 | <0.001 | <0.001 | <0.001 | <0.001 |

**Table S11.** Aluminum concentrations in litterfall and soil beneath the five tree species.

| Aluminum                                                                                                                                  |                              |                              |                               |                             |                               |                |
|-------------------------------------------------------------------------------------------------------------------------------------------|------------------------------|------------------------------|-------------------------------|-----------------------------|-------------------------------|----------------|
| Litterfall                                                                                                                                | Balsam<br>Fir                | Eastern<br>Hemlock           | White<br>Pine                 | Sugar<br>Maple              | Yellow<br>Birch               | <i>p</i> Value |
| Coniferous                                                                                                                                | 134.2<br>(42.3)              | 236.7<br>(8.9)               | 205.4<br>(20.5)               | --                          | --                            | 0.084          |
| Deciduous                                                                                                                                 | 48.2 <sup>ab</sup><br>(5.1)  | 70.6 <sup>a</sup><br>(0.6)   | 479.3 <sup>a</sup><br>(382.8) | 34.8 <sup>b</sup><br>(3.9)  | 33.7 <sup>b</sup><br>(9.0)    | 0.037          |
| Woody Debris                                                                                                                              | 74.3 <sup>a</sup><br>(4.2)   | 211.1 <sup>b</sup><br>(18.8) | --                            | 76.3 <sup>a</sup><br>(24.0) | 36.7 <sup>a</sup><br>(7.2)    | 0.001          |
| <b>Horizon</b>                                                                                                                            |                              |                              |                               |                             |                               |                |
| L                                                                                                                                         | 18.6 <sup>ab</sup><br>(9.0)  | 47.8 <sup>ab</sup><br>(27.9) | 55.7 <sup>ab</sup><br>(8.6)   | 13.2 <sup>a</sup><br>(4.4)  | 79.3 <sup>b</sup><br>(7.0)    | 0.019          |
| FH                                                                                                                                        | 64.8 <sup>ab</sup><br>(29.8) | 84.5 <sup>ab</sup><br>(46.4) | 157.8 <sup>ab</sup><br>(58.5) | 41.0 <sup>a</sup><br>(14.3) | 606.0 <sup>b</sup><br>(439.5) | 0.027          |
| Litterfall and exchangeable cation concentrations in mg/kg,<br>(--)= not enough litter collected for analysis, Standard error in brackets |                              |                              |                               |                             |                               |                |

**Table S12.** Manganese concentrations in litterfall and soil beneath the five tree species.

| Litterfall                                                                                                                                 | Manganese                      |                              |                   |                                |                                | p value |
|--------------------------------------------------------------------------------------------------------------------------------------------|--------------------------------|------------------------------|-------------------|--------------------------------|--------------------------------|---------|
|                                                                                                                                            | Balsam<br>Fir                  | Eastern<br>Hemlock           | White<br>Pine     | Sugar<br>Maple                 | Yellow<br>Birch                |         |
| Coniferous                                                                                                                                 | 883.2<br>(230.4)               | 529.5<br>(85.2)              | 803.5<br>(61.1)   | --                             | --                             | 0.204   |
| Deciduous                                                                                                                                  | 1383.0<br>(245.5)              | 1211.2<br>(29.3)             | 1049.2<br>(111.2) | 708.0<br>(130.6)               | 1271.1<br>(293.5)              | 0.071   |
| Woody Debris                                                                                                                               | 1041.4 <sup>a</sup><br>(212.0) | 295.7 <sup>b</sup><br>(28.5) | --                | 552.2 <sup>ab</sup><br>(161.2) | 753.3 <sup>ab</sup><br>(134.1) | 0.048   |
| <b>Horizon</b>                                                                                                                             |                                |                              |                   |                                |                                |         |
| L                                                                                                                                          | 1276.1<br>(535.2)              | 576.0<br>(83.7)              | 806.7<br>(125.0)  | 797.0<br>(156.2)               | 951.6<br>(274.1)               | 0.455   |
| FH                                                                                                                                         | 921.4<br>(462.6)               | 672.0<br>(37.5)              | 581.9<br>(144.1)  | 695.8<br>(154.3)               | 734.3<br>(263.3)               | 0.866   |
| Litterfall and exchangeable cation concentrations in mg/kg,<br>(--) = not enough litter collected for analysis, Standard error in brackets |                                |                              |                   |                                |                                |         |

**Table S13.** Zinc concentrations in litterfall and soil beneath the five tree species.

| Zinc                                                                                                                   |                              |                               |                             |                             |                              |                |
|------------------------------------------------------------------------------------------------------------------------|------------------------------|-------------------------------|-----------------------------|-----------------------------|------------------------------|----------------|
| Litterfall                                                                                                             | Balsam<br>Fir                | Eastern<br>Hemlock            | White<br>Pine               | Sugar<br>Maple              | Yellow<br>Birch              | <i>p</i> Value |
| Coniferous                                                                                                             | 57.7<br>(12.9)               | 37.1<br>(5.5)                 | 47.5<br>(4.1)               | --                          | --                           | 0.222          |
| Deciduous                                                                                                              | 87.4 <sup>ab</sup><br>(14.2) | 104.9 <sup>ab</sup><br>(41.5) | 44.9 <sup>a</sup><br>(17.3) | 44.6 <sup>a</sup><br>(3.6)  | 200.5 <sup>b</sup><br>(66.2) | 0.006          |
| Woody Debris                                                                                                           | 63.1 <sup>a</sup><br>(5.6)   | 13.2 <sup>b</sup><br>(13.2)   | --                          | 54.4 <sup>ab</sup><br>(8.3) | 118.2 <sup>c</sup><br>(14.6) | 0.002          |
| <b>Horizon</b>                                                                                                         |                              |                               |                             |                             |                              |                |
| L                                                                                                                      | 94.2 <sup>a</sup><br>(14.2)  | 51.4 <sup>a</sup><br>(9.7)    | 59.2 <sup>a</sup><br>(8.0)  | 63.6 <sup>a</sup><br>(10.3) | 181.9 <sup>b</sup><br>(47.3) | 0.001          |
| FH                                                                                                                     | 75.3<br>(21.3)               | 63.0<br>(1.8)                 | 53.2<br>(3.4)               | 68.5<br>(16.4)              | 117.4<br>(29.9)              | 0.158          |
| Total elemental concentrations in mg/kg,<br>(--)= not enough litter collected for analysis, Standard error in brackets |                              |                               |                             |                             |                              |                |

**Table S14.** Strontium concentrations in litterfall and soil beneath the five tree species.

| Strontium                                                                                                              |                             |                             |                            |                             |                             |                |
|------------------------------------------------------------------------------------------------------------------------|-----------------------------|-----------------------------|----------------------------|-----------------------------|-----------------------------|----------------|
| Litterfall                                                                                                             | Balsam<br>Fir               | Eastern<br>Hemlock          | White<br>Pine              | Sugar<br>Maple              | Yellow<br>Birch             | <i>p</i> Value |
| Coniferous                                                                                                             | 44.6 <sup>a</sup><br>(2.2)  | 36.2 <sup>a</sup><br>(13.3) | 9.8 <sup>b</sup><br>(2.5)  | --                          | --                          | 0.001          |
| Deciduous                                                                                                              | 70.7 <sup>a</sup><br>(6.3)  | 51.7 <sup>b</sup><br>(12.6) | 14.3 <sup>b</sup><br>(3.8) | 74.6 <sup>a</sup><br>(7.4)  | 63.1 <sup>a</sup><br>(3.2)  | <0.001         |
| Woody Debris                                                                                                           | 62.5 <sup>ab</sup><br>(9.0) | 16.1 <sup>a</sup><br>(1.4)  | --                         | 83.2 <sup>b</sup><br>(18.4) | 56.4 <sup>ab</sup><br>(2.1) | 0.019          |
| <b>Horizon</b>                                                                                                         |                             |                             |                            |                             |                             |                |
| L                                                                                                                      | 77.0 <sup>a</sup><br>(5.6)  | 36.1 <sup>b</sup><br>(5.6)  | 16.0 <sup>b</sup><br>(1.9) | 81.8 <sup>a</sup><br>(5.9)  | 81.8 <sup>a</sup><br>(7.4)  | <0.001         |
| FH                                                                                                                     | 53.0 <sup>a</sup><br>(11.2) | 32.4 <sup>ab</sup><br>(7.3) | 15.5 <sup>b</sup><br>(1.7) | 50.1 <sup>a</sup><br>(6.5)  | 55.8 <sup>a</sup><br>(4.7)  | 0.002          |
| Total elemental concentrations in mg/kg,<br>(--)= not enough litter collected for analysis, Standard error in brackets |                             |                             |                            |                             |                             |                |

**Table S15.** Copper concentrations in litterfall and soil beneath the five tree species.

| Litterfall                                                                                                             | Copper                     |                           |                           |                           |                           | <i>p</i> Value |
|------------------------------------------------------------------------------------------------------------------------|----------------------------|---------------------------|---------------------------|---------------------------|---------------------------|----------------|
|                                                                                                                        | Balsam<br>Fir              | Eastern<br>Hemlock        | White<br>Pine             | Sugar<br>Maple            | Yellow<br>Birch           |                |
| Coniferous                                                                                                             | 3.4<br>(2.7)               | 2.7<br>(2.1)              | 0.8<br>(0.8)              | --                        | --                        | 0.462          |
| Deciduous                                                                                                              | 8.2<br>(5.1)               | 8.5<br>(3.8)              | 4.2<br>(1.2)              | 7.1<br>(1.9)              | 6.1<br>(1.2)              | 0.830          |
| Woody Debris                                                                                                           | 7.1<br>(0.8)               | 10.1<br>(5.0)             | --                        | 6.5<br>(1.2)              | 11.3<br>(1.3)             | 0.642          |
| <b>Horizon</b>                                                                                                         |                            |                           |                           |                           |                           |                |
| L                                                                                                                      | 8.0 <sup>a</sup><br>(3.5)  | 4.9 <sup>a</sup><br>(1.4) | 0.1 <sup>b</sup><br>(0.1) | 4.5 <sup>a</sup><br>(0.6) | 8.2 <sup>a</sup><br>(1.2) | <0.001         |
| FH                                                                                                                     | 5.7 <sup>ab</sup><br>(0.8) | 8.1 <sup>a</sup><br>(1.6) | 0.4 <sup>b</sup><br>(0.3) | 8.0 <sup>a</sup><br>(1.9) | 9.1 <sup>a</sup><br>(0.7) | 0.003          |
| Total elemental concentrations in mg/kg,<br>(--)= not enough litter collected for analysis, Standard error in brackets |                            |                           |                           |                           |                           |                |

**Table S16.** Cadmium concentrations in litterfall and soil beneath the five tree species.

| Litterfall                                                                                                             | Cadmium                    |                             |                           |                           |                           | <i>p</i> Value |
|------------------------------------------------------------------------------------------------------------------------|----------------------------|-----------------------------|---------------------------|---------------------------|---------------------------|----------------|
|                                                                                                                        | Balsam<br>Fir              | Eastern<br>Hemlock          | White<br>Pine             | Sugar<br>Maple            | Yellow<br>Birch           |                |
| Coniferous                                                                                                             | <0.1<br>(<0.1)             | 0.1<br>(0.1)                | 0.1<br>(<0.1)             | --                        | --                        | 0.064          |
| Deciduous                                                                                                              | 0.4 <sup>a</sup><br>(0.2)  | 0.7 <sup>ab</sup><br>(0.1)  | 0.1 <sup>a</sup><br>(0.1) | 0.3 <sup>a</sup><br>(0.1) | 1.7 <sup>b</sup><br>(0.6) | 0.289          |
| Woody Debris                                                                                                           | 0.3 <sup>ab</sup><br>(0.2) | <0.1 <sup>a</sup><br>(<0.1) | --                        | 0.7 <sup>b</sup><br>(0.1) | 0.7 <sup>b</sup><br>(0.1) | 0.004          |
| <b>Horizon</b>                                                                                                         |                            |                             |                           |                           |                           |                |
| L                                                                                                                      | 0.6 <sup>a</sup><br>(0.1)  | 0.4 <sup>a</sup><br>(0.1)   | 0.7 <sup>a</sup><br>(0.1) | 0.7 <sup>a</sup><br>(0.1) | 1.6 <sup>b</sup><br>(0.2) | <0.001         |
| FH                                                                                                                     | 0.4<br>(0.2)               | 0.7<br>(0.1)                | 0.5<br>(0.1)              | 0.5<br>(0.2)              | 1.3<br>(0.2)              | 0.080          |
| Total elemental concentrations in mg/kg,<br>(--)= not enough litter collected for analysis, Standard error in brackets |                            |                             |                           |                           |                           |                |
